# Supplementary material
Source: publisher figshare collection journal article supplement (https://karger.figshare.com/ndownloader/files/25818611)
Supplement: Supplementary file 1 [file 25818611]

**Table S3**. Percentage of positive results in pollen panel prick test (N = 421).

| **Allergen** | **% positive results (n = 421)** |
| --- | --- |
| Olive tree | 61.0% |
| Mugwort (*Artemisa vulgaris*) | 44.0% |
| Grass | 43.0% |
| Pigweed (*Chenopodium album*) | 42.5% |
| Prickly saltwort (*Salsola kali)* | 40.0% |
| Plane tree | 31.0% |
| Cypress (*Cupressus arizonica*) | 28.3% |
| Wall pellitory (*Parietaria judaica*) | 18.5% |
| Birch | 6.7% |
